# Supplementary material
Source: Springer Nature journal article supplement (https://www.springermedizin.de/resource/supplementary/12955_2013_1297_MOESM1_ESM.pdf/9559514)
Supplement: MOESM1 [file 9559514]

## EMOTIONAL

Pain, fear, worry,  
anxiety, stress, crying,  
upset, motivation,  
determination

Letting go, over  
protection,  
being safe &  
careful

Isolation

Fractures,  
Being  
different

Additional  
support,  
opportunities

## FUNCTIONAL

Equipment,  
adaptation,  
independence,  
reduced function

## IMPACT

Family life, outings,  
holidays, siblings,  
planning, time off  
work, lack of  
knowledge
